# Supplementary material
Source: publisher site journal article supplement (https://www.dovepress.com/article/282228)
Supplement: Supplementary file 1 [file get_supplementary_file.php]

**Access to Care for Chronic Pain Patients**

**QUALITATIVE INTERVIEW GUIDE - PATIENTS**

**INTRODUCTION:** Hi, my name is **[Interviewer name]** and I’m an interviewer for this research study.

As a reminder, we will be recording this interview so I can focus on our discussion without having to take too many notes. **Just to confirm, is it OK with you that I record this interview?**

**Begin recording via BlueJeans and turn on the audio recorder.**

**INFORMED CONSENT:**

**Read:** OK, this is **[Interviewer name]** conducting an interview over the phone with **[Participant ID]** at the University of Michigan on **[date]** at about **[time].**

Thank you for agreeing to participate in this 30-minute phone interview for our study. We would like to learn about your experiences with receiving medications for your pain. We are interested in your honest opinions, whether they are positive or negative. We will not share what you tell us with any of your medical providers or anyone outside of this research study. We will summarize what we learn from you today and make recommendations to the state about how health services can be improved. We will NOT name anyone, disclose who made which recommendations, or include any information that identifies specific people.

Some of the questions I ask may deal with sensitive topics and private behaviors and feelings. Please remember that you are not required to answer any questions you do not want to and may ask me to skip to the next question at any point in this interview. You can stop the interview at any time without consequence.

We will use a University of Michigan conference call software to record the interview along with a digital audio recorder as a backup should the conference call unexpectedly drop. No one outside of this study will have access to either copy of the interview recordings, and the recording will only be used for the purposes of this research study. To protect your privacy, please try not to mention any identifying information, such as names or birthdays. When the interview is transcribed, any identifying information you may reveal will be removed, and the audio recordings will be destroyed after our final report is written.

We understand that managing chronic pain is difficult and can be very stressful. Your safety is important to us, and our goal is for all patients to receive adequate care. Following the completion of this interview, we will send you additional resources regarding opioid medications, drug and alcohol use, and mental health services in Michigan. Additionally, if requested, we can have the principal investigator of our study reach out to you directly.

**Do you have any questions before we start?**

**Do you agree to participate in this study as it was just described?**

**[Answer questions and obtain participant’s verbal consent]**

**CRISIS MANAGEMENT:**

If at any point in the interview, the patient mentions:

- Buying/obtaining medications from friends/family AND loss of control, compulsions, cravings
- Illicit drug use

**At the end of the interview, say:**

“I know talking about these topics can be stressful, and a couple of things you mentioned during our conversation have caused me to worry that you may be at risk of misusing opioids. I will be following up with you via email with some resources that may be helpful. Also, I am happy to connect you with our principal investigator, Dr. Lagisetty. She is a primary care physician and could call you to discuss further. Is this something you would be interested in?

Please keep a log of any cases like this and contact Dr. Lagisetty following the encounter to discuss.

If at any point in the interview, the patient:

- Refers to thoughts of suicide
- Describes a plan to take their own life
- Makes any indication of self harm or harm to others
- You feel like they are at imminent risk of an adverse health related outcome (e.g. overdose, acute shortness of breath, chest pain)

**Stop the interview immediately, and say:**

“I know talking about these topics can be stressful. What you’re telling me is causing me concern for your safety, and I think it’s best we stop the interview at this time. I also think you should call the National Suicide Prevention Lifeline at 1-800-273-8255, call 911, or visit your local emergency room for evaluation. I’m also going to page the principal investigator of this study, so she can reach out to you directly for follow up.”

**INTERVIEW QUESTIONS:**

**Section 1: Confirm eligibility and demographics:**

1. Before we get started, we just need to confirm a few things before starting this interview.
   1. Have you experienced pain in the past and/or are you currently experiencing pain?
   2. Are you currently taking or have you previously taken an opioid (such as Percocet, Vicodin, or Norco) for the treatment of your pain?
   3. Have you had or are you currently having difficulty receiving a prescription for an opioid from your primary care doctor?

If the answer is no to C—let patient know that he/she does not meet criteria for the interview:

The purpose of our study is to understand the difficulties patients may face in receiving a prescription for an opioid from their primary care doctor. Because you have not experienced difficulties receiving your prescriptions, you are not eligible for the study. I apologize for any inconvenience this may have caused you, and thank you for your time.

1. We have a few basic demographic questions to go over. You don’t have to answer any questions you don’t want to, but your honest responses are appreciated:
   1. How old are you?
   2. Can you please tell me your level of education from the options I’m about to list?
      - Did not complete high school/GED
      - Completed high school/GED
      - Associates/Bachelor’s Degree
      - Graduate/Professional Degree
   3. Which of the following best describes your race/ethnicity? You may pick more than one.
      - White
      - Black or African American
      - Hispanic or Latino/a
      - Asian
      - American Indian or Alaska Native
      - Native Hawaiian or Other Pacific Islander
      - Other ____________
      - Prefer not to say

**Section 2: Chronic pain and opioid prescription history**

1. To get started, please tell me about your first experience receiving prescription pain medications.

**PROBES:** when was first prescription, medication, dose, length of dose

- 1. How did you feel about being prescribed pain medication?

1. What ways, if at all, has your treatment with opioids changed since you were first prescribed pain medication?

**PROBES**: dose changes, medication type, how well did each medication work

**Section 3: Difficulties obtaining opioids and effects**

1. Tell me about when you first began experiencing difficulties getting prescribed opioids for your pain.

**PROBES:** specific event (refill Rx early, asked for higher dose, change in provider, new insurance, etc)

- 1. Why do you think it became more difficult for you to get your pain medication?
  2. Describe to me how that made you feel.
  3. How did you respond?

1. What reasons, if any, did your health care provider give you for [name specific thing participant mentioned in #4]?
2. Tell me about how your health care provider talked with you about [name specific thing participant mentioned in #4).

**PROBES:** recommendations, alternative treatments (non-opioid meds, procedures like injections, physical therapy)

- 1. How did you feel about each these options when they were presented to you?
  2. Did you use any of these alternative treatments? [**If yes**, which ones?]
  3. How did they work for you?
  4. Is there anything you do on your own to manage your pain that your doctor did not recommend?
  5. Did you use any information resources, like the Internet, to try and find alternative treatments for chronic pain?

1. Some individuals in this situation may try to or have been required to see other doctors to help manage their pain. Have you sought out a new doctor to find treatment for your pain?

**PROBES:** what types of doctors/how many, time spent, time to schedule new appointment

- 1. How was your meeting with that doctor? How did they respond to you?
  2. How did you feel during this experience?
  3. What kind of difficulties did you experience in your efforts to find a new doctor? In your meeting with that new doctor?

**PROBE:** Did potential new doctors ask about your pain/other symptoms/reasons for wanting a new doctor?

1. What, if any, concerns have you had about your prescription running out and/or not having a doctor to care for you?
   1. Please tell me more about that experience.

**PROBES:** what caused concern? insurance issues, lost/stolen pills, different doctor for each visit

- 1. What did you do to manage your pain?

**PROBES**: borrow from a friend, ED visit, other use?

1. Some people in this situation have sought support from patient support organizations, policy makers or legal advice while some have not for a variety of reasons. Have you ever tried to find assistance such as this? If so, what type of assistance? What was the result?
2. Do you feel like the difficulties you face in receiving your pain medications has impacted your ability to receive care for other medical conditions you have?
   1. If so, which ones?
   2. Was the harm permanent or was it able to be corrected?
   3. How were you able to correct it?

1. What, if any, effects has this experience had on your personal or professional responsibilities?

**Section 4: Improving access and policy**

1. How, if at all, has having an opioid prescription affected your ability to find a new doctor?
   1. [If have not sought new doc] How, if at all, do you think having an opioid prescription would affect your ability to find a new doctor?
2. What advice would you give to policymakers on how to improve access to doctors and healthcare for patients in your situation?
   1. What advice would you give doctors about caring for patients in chronic pain?
   2. What advice would you give other patients who are having a hard time getting their pain medications refilled?
3. Is there anything else you would like to tell us about your experiences with seeking treatment for chronic pain or getting your medications refilled?
4. Based on your experience, what are other important things I didn’t ask about but you think we should know about this topic?

**Close:** Thank you very much for your time and sharing your experiences. As I said at the beginning of our conversation, your safety is important to us and our goal is for all patients to receive adequate care. Following the completion of this interview, we will email you additional resources regarding opioid medications, drug and alcohol use, and mental health services in Michigan. I’m going to end the recording now.

**End BlueJeans recording and turn off audio recorder.**

**Access to Care for Chronic Pain Patients**

**QUALITATIVE INTERVIEW GUIDE - CLINICIANS**

**INTRODUCTION:** Hi, my name is **[Interviewer name]** and I’m an interviewer for this research study.

As a reminder, we will be recording this interview so I can focus on our discussion without having to take too many notes. **Just to confirm, is it OK with you that I record this interview?**

**Begin recording via BlueJeans and turn on the audio recorder.**

**INFORMED CONSENT:**

**Read:** OK, this is [**Interviewer name**] conducting an interview over the phone with **[Participant ID]** at the University of Michigan on **[date]** at about **[time].**

Thank you for agreeing to participate in this 20-minute phone interview for our study. We would like to learn more about the experiences you have had with prescribing opioids for chronic pain. Your in-depth feedback will help us better understand the complexities of caring for this patient population amidst the opioid epidemic. Your input is of great value to help inform opioid prescribing guidelines and policies within the State of Michigan.

We are interested in your honest opinions, whether they are positive or negative. We will not share what you tell us with anyone outside of this research study. We will summarize what we learn from you today and make recommendations about how health services can be improved, but we won’t name anyone, disclose who made which recommendations, or include any information that identifies specific people.

Some of the questions I will ask may deal with difficult or sensitive topics. Please remember that you do not have to answer any questions that you do not want to. You can end the interview at any time without consequence.

We are using a digital audio recorder to record this interview. No one outside of this study will have access to a copy of the interview recording. The recording will be used for the purposes of this research study only.

To protect your privacy, please try not to mention any identifying information, such as names or birthdays. When the interview is transcribed, any identifying information you may reveal will be removed, and the audio recordings will be destroyed after our final report is written.

**Do you have any questions before we start?**

**Do you agree to participate in this study as it was just described?**

**[Answer questions and obtain participant’s verbal consent]**

**Section 1: Changes in opioid prescribing**

1. To get started, can you tell me a little bit about your background?

**PROBE:** briefly, what do you do on a day-to-day basis?

- 1. How many patients are on your panel?
  2. How many patients do you see on a daily basis?
  3. Do you have any other roles or duties? (ie: teaching, research, hospital attending)
  4. **How many years have you been practicing?**

1. Roughly how many of your patients are on opioid therapy and has this changed in recent years?

**PROBE:** breakdown between short term prescribing vs long term therapy

1. What ways, if any, have you changed your opioid prescribing practices in recent years?

**PROBES**: changes in total opioid prescriptions, changes in doses, greater use of other medications (which ones), greater use of other modalities besides medications (which ones)

**PROBES:** How do you care differently for patients in chronic pain?

**[If has made changes]**: What would you say are the **main drivers** of these changes? (regulations, prior authorizations, reimbursement, fear of misuse, professional liability)

**[If has made changes]**: What are the **biggest challenges** you have faced in making [the above changes]?

**PROBE**: Tell me about how your patients on opioids have responded to your efforts to make these changes. [Tell a story about illustrative case.]

**[If has not made changes]**: Tell me more about your reasons for why you have not made changes. (already prescribed few opioids, low doses)

1. Do you, or any other providers at your clinic, have a DEA X-waiver to prescribe buprenorphine?
   1. If yes, do you publicly advertise this to potential patients?
   2. If yes, how has this affected your day-to-day duties or roles within your job?
2. What are your views about the new regulations providers face in prescribing opioids?

**PROBES**: new regulations, need for prior authorization, etc.

- 1. How do you learn about these new regulations?
  2. How do you learn about alternative treatments/resources?

**Section 2: Accepting new patients on chronic opioid therapy**

1. What ways, if any, do your opioid prescribing practices differ between patients you have seen for a while versus a new patient?
2. How do you care for new patients requesting opioids for pain?
   1. What, if any, clinic rules or general principles do you think about before agreeing to accept these new patients? Do you communicate these principles to your office staff?
   2. What, if any, additional information do you try to determine prior to accepting the patient? (e.g. PDMP checks, review prior medical records)
   3. **[If restricting]** What are some of your key reasons for that [being conservative about accepting these patients]?

We have heard that some primary care physicians are reluctant to accept new patients on long term opioids.

1. What are your thoughts on this?
2. If patients can’t find a PCP because they’re on opioids, how do you think it may impact their other medical conditions? What about their mental health conditions?
3. Are you concerned they may turn to other sources to get their opioids?
4. What are your views on who best should care for this population?
   **PROBES:** pain specialists, addiction specialists, behavioral/physical therapists, etc
   1. Why do you think [named population] is best?

**Section 3: How to increase access**

1. If primary care practices are not accepting new patients needing opioids, what types of changes in policy or practices would you recommend to care for this population?
2. What, if anything, would make it easier for you as a provider to care for these patients?
3. Is there anything else you would like to tell us about caring for chronic pain patients or opioid prescribing practices?
4. Any questions we should be asking of providers that you think we may have missed?

**Closing Script:** Thank you very much for your time and sharing your experiences. I’m going to end the recording now.

**End Bluejeans recording and turn off audio recorder**

**Access to Care for Chronic Pain Patients**

**QUALITATIVE INTERVIEW GUIDE – OFFICE STAFF**

**INTRODUCTION:** Hi, my name is **[Interviewer name]** and I’m an interviewer for this research study.

As a reminder, we will be recording this interview so I can focus on our discussion without having to take too many notes. **Just to confirm, is it OK with you that I record this interview?**

**Begin recording via BlueJeans and turn on the audio recorder.**

**INFORMED CONSENT:**

**Read:** OK, this is [**Interviewer name**] conducting an interview over the phone with **[Participant ID]** at the University of Michigan on **[date]** at about **[time].**

Thank you for agreeing to participate in this 15-minute phone interview for our study. We would like to learn more about the experiences you have had with working in a healthcare setting with patients who are prescribed opioids for chronic pain. Your in-depth feedback will help us better understand the complexities of caring for this patient population amidst the opioid epidemic. Your input is of great value to help inform opioid prescribing guidelines and policies within the State of Michigan.

We are interested in your honest opinions, whether they are positive or negative. We will not share what you tell us with anyone outside of this research study. We will summarize what we learn from you today and make recommendations about how health services can be improved, but we won’t name anyone, disclose who made which recommendations, or include any information that identifies specific people.

Some of the questions I will ask may deal with difficult or sensitive topics. Please remember that you do not have to answer any questions that you do not want to. You can end the interview at any time without consequence.

We are using a University of Michigan conference call software to record the interview along with a digital audio recorder as a backup should the conference call unexpectedly drop. No one outside of this study will have access to either copy of the interview recordings. The recording will be used for the purposes of this research study only.

To protect your privacy, please try not to mention any identifying information, such as names or birthdays. When the interview is transcribed, any identifying information you may reveal will be removed, and the audio recordings will be destroyed after our final report is written.

**Do you have any questions before we start?**

**Do you agree to participate in this study as it was just described?**

**[Answer questions and obtain participant’s verbal consent]**

**Section 1: Introduction and Background**

1. To get started, can you please tell me a little bit about your background/role in the office?
   1. How long have you worked here?
   2. What is your official title?
   3. What tasks are you responsible for?
2. What kind of interaction do you have with patients on a daily basis? (ie: scheduling appointments, billing, recording patient information in chart)
   1. How many patients do you see/speak to?
   2. How long do you spend with each patient?

**Section 2: Caring for patients on chronic opioid therapy**

1. How much time each day do you spend caring for patients who take opioid medications?
   1. Fielding phone calls for refill requests, checking PDMP, scheduling appointments
2. Does the office you work for have any set policies or rules regarding seeing patients who take opioid pain medications?
   1. Are these policies clearly stated and followed by all office staff, or are they unspoken/changing?
   2. How did you learn of these policies?
   3. **Why were these policies put into place?**
   4. **Was that told to you by the provider or another staff member?**
   5. **Are you given guidance on how to discuss opioids with these patients?**
      1. **If no, how do you usually communicate with these patients?**
3. What ways, if any, do opioid prescribing practices differ between established patients and new patients in your office?
   1. **Are there differences between patients with acute pain vs those on long term opioids seeking a new doctor?**
   2. Are established patients more likely to receive care/medications?
4. If a patient calls your office requesting a new patient appointment for pain management and states that they have been taking opioid medications, is your office willing to see them as a new patient?
   1. If yes, what, if any, additional information do you request prior to accepting the patient? (prior medical records, medication dose/frequency, reason for using pain medication)

We have heard that some primary care physicians are reluctant to accept new patients on long term opioids.

1. What are your thoughts on this?
2. If patients can’t find a PCP because they’re on opioids, how do you think it may impact their other medical conditions? What about their mental health conditions?
3. Are you concerned they may turn to other sources to get their opioids?
4. Is there anything you would like to share with me about caring for patients with chronic pain or an experience you’ve had that stands out to you?
5. Are there any questions we should be asking of healthcare employees that you think we may have missed?

**Closing Script:** Thank you very much for your time and sharing your experiences. I’m going to end the recording now.

**End Bluejeans recording and turn off audio recorder**
